# Supplementary material for: Bioinformatic Analysis of Structure and Function of LIM Domains of Human Zyxin Family Proteins
Source: PubMed Central journal article supplement (PMC7961639; doi:10.3390/ijms22052647), 2021-03-05
Supplement: ijms-22-02647-s001.pdf [file ijms-22-02647-s001.pdf]

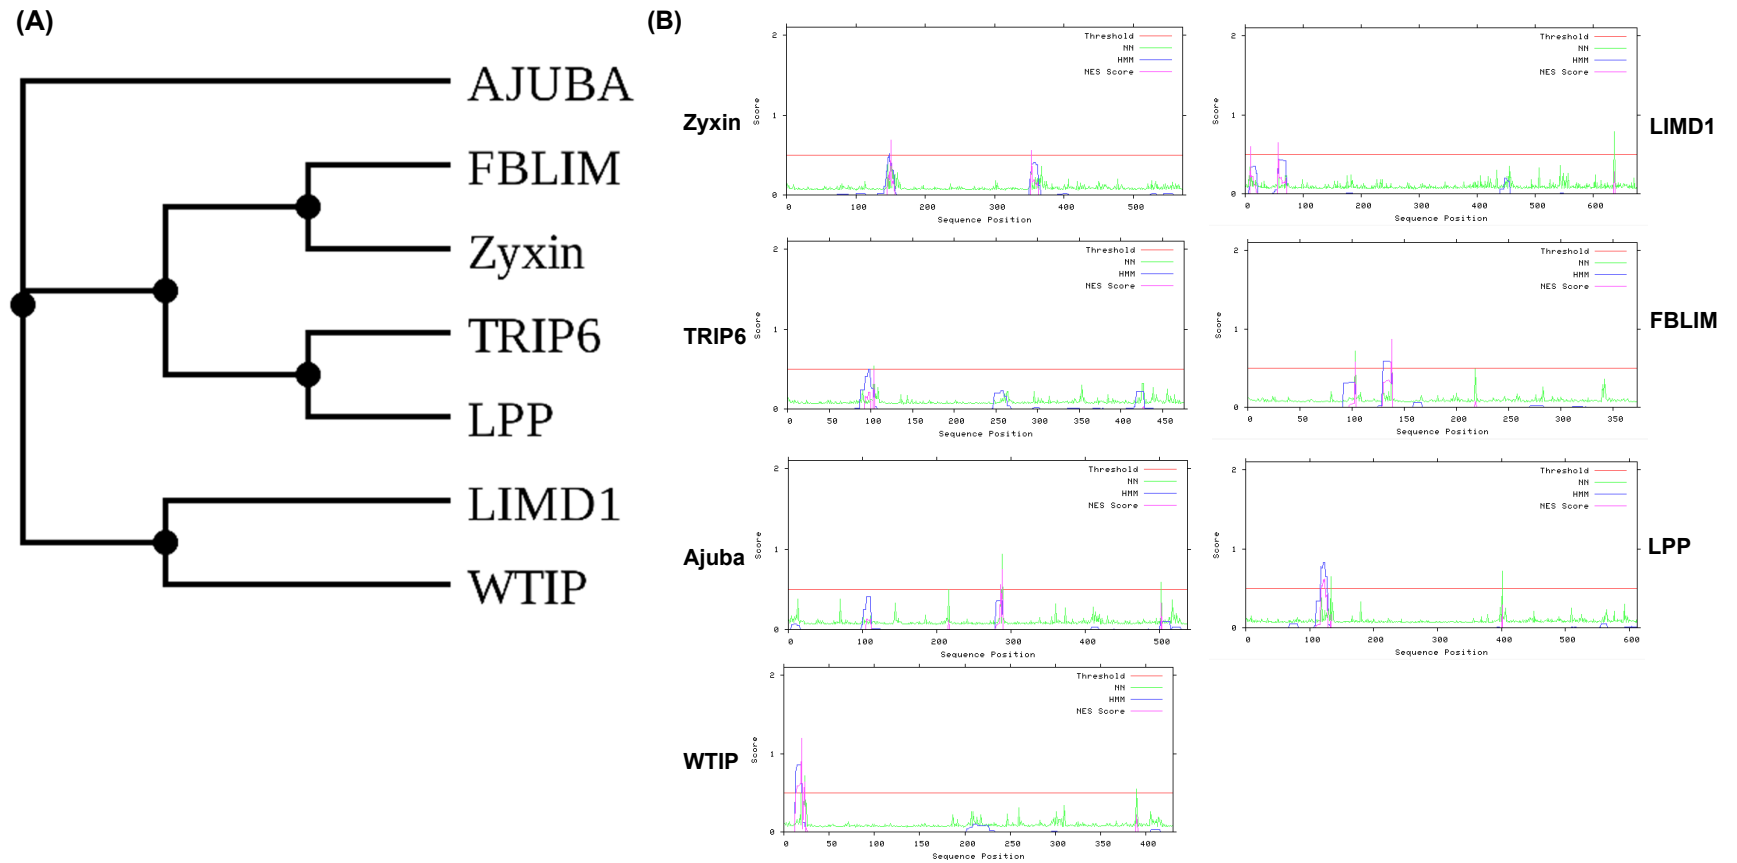

**Supplementary Figure 2. Phylogenetic and NetNES analysis of the Zyxin family proteins. (A) phylogenetic tree created by Maximum Likelihoods Method on PhyML 3.0 server (B) NetNES analysis was done to identify the Leucine-rich motif nuclear export sequence (NES) responsible for nuclear transport of protein. The NES was identified through combined analysis implemented by Neural Network (NN), Hidden Markov Model (HMM) and NES scoring algorithm. Only the sequences giving a peak higher than threshold using all three algorithms was identified as NES.**

8  
9  
10  
11  
12

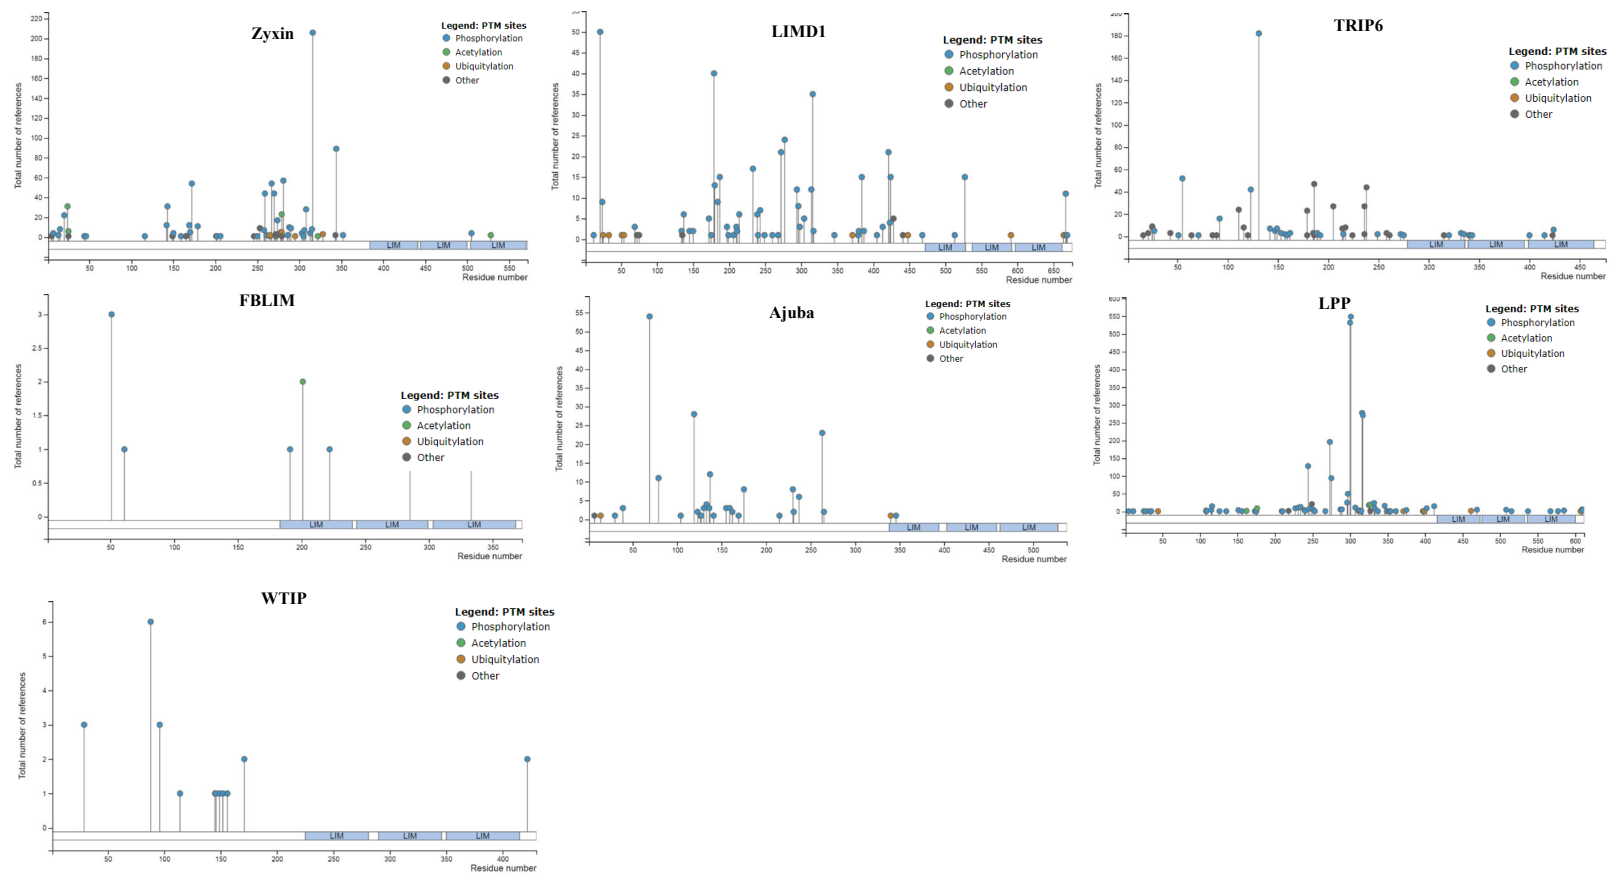

**Supplementary Figure 3.** Identification of post-translation modification (PTM) sites of Zyxin family proteins. All proteins exhibited sites for PTM. However, PTMs varied amongst all the member proteins, with the highest PTM observed for LPP, and the lowest for FBLIM1.

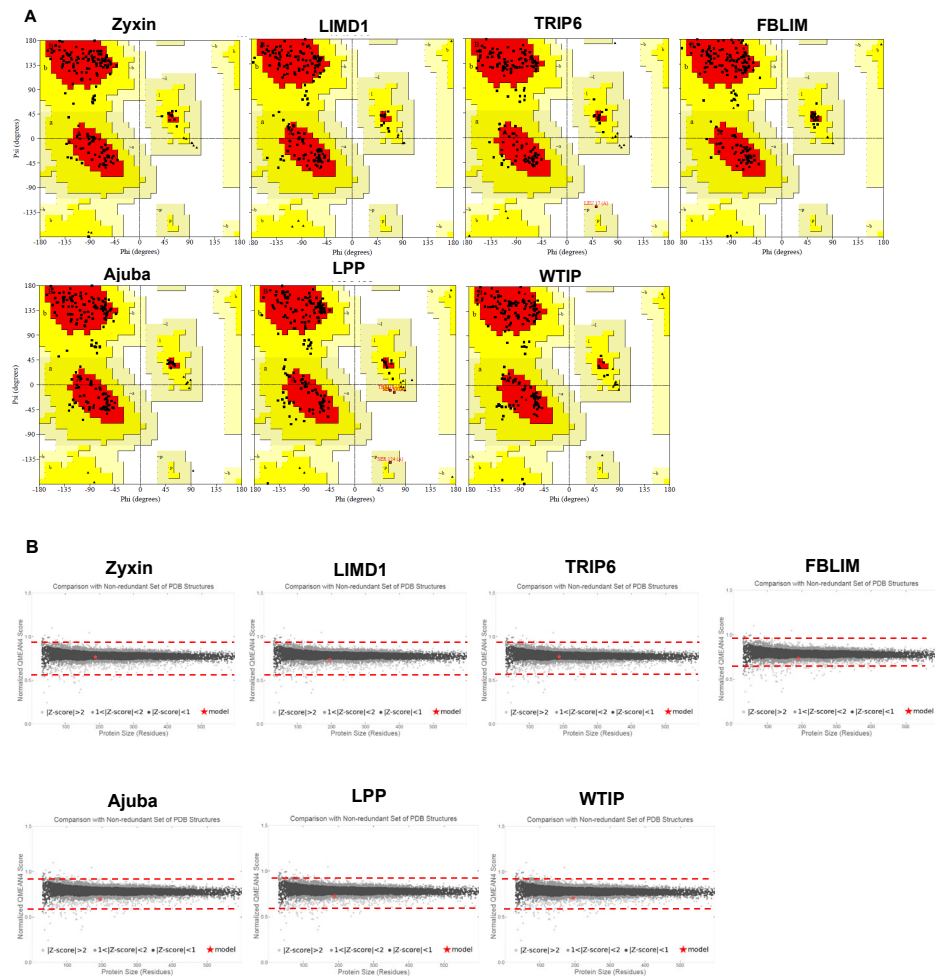

**Supplementary Figure 4.** (A) Validation of homology models by Ramachandran plot. Models generated for members of Zyxin family were validated through Ramachandran plots. All models had acceptable Ramachandran values. (B) Absolute quality estimation of all the models by QMEAN, reflecting the native character and quality, red star indicating the query model position while comparing with all available models in PDB.

```

# Job: Lim_Zyx
# Query: s001A
# No: Chain Z rmsd lali nres %id PDB Description
1: 1rut-X 9.7 4.7 141 157 26 MOLECULE: FUSION PROTEIN OF LMO4 PROTEIN AND LIM DOMAIN-BIN
2: 2dfy-X 9.5 4.6 140 158 26 MOLECULE: FUSION PROTEIN OF LIM DOMAIN TRANSCRIPTION FACTOR
3: 2dfy-C 9.4 4.6 140 158 26 MOLECULE: FUSION PROTEIN OF LIM DOMAIN TRANSCRIPTION FACTOR
4: 2rgt-B 9.4 7.1 135 154 28 MOLECULE: FUSION OF LIM/HOMEBOX PROTEIN LHX3, LINKER, INSU
5: 6cme-A 9.4 13.2 98 154 24 MOLECULE: LIM/HOMEBOX PROTEIN LHX4,INSULIN GENE ENHANCER P
6: 4jcj-B 9.4 4.1 86 148 23 MOLECULE: INSULIN GENE ENHANCER PROTEIN ISL-1,LIM DOMAIN-BI
7: 3mmk-A 9.3 12.9 118 151 30 MOLECULE: FUSION OF LIM/HOMEBOX PROTEIN LHX4, LINKER, INSU
8: 4jcj-C 9.2 4.4 86 150 23 MOLECULE: INSULIN GENE ENHANCER PROTEIN ISL-1,LIM DOMAIN-BI
9: 4jcj-A 9.2 3.7 81 144 25 MOLECULE: INSULIN GENE ENHANCER PROTEIN ISL-1,LIM DOMAIN-BI
10: 3mmk-B 9.2 13.2 121 154 28 MOLECULE: FUSION OF LIM/HOMEBOX PROTEIN LHX4, LINKER, INSU
11: 2rgt-A 8.5 4.9 118 148 30 MOLECULE: FUSION OF LIM/HOMEBOX PROTEIN LHX3, LINKER, INSU
12: 1b8t-A 7.5 2.0 65 192 26 MOLECULE: PROTEIN (CRP1);
13: 2miu-A 7.3 4.6 75 98 24 MOLECULE: FOUR AND A HALF LIM DOMAINS PROTEIN 2;
14: 2xjz-E 7.1 6.1 115 127 25 MOLECULE: RHOMBOTIN-2;
15: 2xjz-D 7.0 5.9 115 129 25 MOLECULE: RHOMBOTIN-2;
16: 2xjy-A 7.0 1.9 59 131 27 MOLECULE: RHOMBOTIN-2;
17: 2dlo-A 6.8 2.5 64 81 59 MOLECULE: THYROID RECEPTOR-INTERACTING PROTEIN 6;
18: 2xqn-T 6.8 2.3 60 125 28 MOLECULE: ACTIN-LIKE PROTEIN 7A;
19: 2ypa-C 6.8 1.8 56 126 27 MOLECULE: T-CELL ACUTE LYMPHOCYTIC LEUKEMIA PROTEIN 1;
20: 2lzu-A 6.8 2.4 64 72 22 MOLECULE: LIM DOMAIN-CONTAINING PROTEIN 2;
21: 2xjz-B 6.8 5.2 113 122 25 MOLECULE: RHOMBOTIN-2;
22: 2iyb-H 6.7 2.8 58 63 21 MOLECULE: PROTEIN ENABLED HOMOLOG;
23: 2iyb-G 6.7 2.9 59 64 20 MOLECULE: PROTEIN ENABLED HOMOLOG;
24: 2iyb-F 6.7 3.0 58 63 21 MOLECULE: PROTEIN ENABLED HOMOLOG;
25: 1x61-A 6.6 3.5 63 72 25 MOLECULE: THYROID RECEPTOR INTERACTING PROTEIN 6;
26: 4kfz-A 6.6 8.3 109 146 25 MOLECULE: LMO-2;
27: 2xjz-A 6.6 5.9 111 125 24 MOLECULE: RHOMBOTIN-2;
28: 2mbv-A 6.5 3.8 72 96 26 MOLECULE: FUSION PROTEIN OF LIM DOMAIN TRANSCRIPTION FACTOR
29: 2iyb-E 6.5 3.1 59 64 20 MOLECULE: PROTEIN ENABLED HOMOLOG;
30: 2xjz-C 6.5 3.1 60 112 17 MOLECULE: RHOMBOTIN-2;
31: 6cme-B 6.4 13.2 122 154 28 MOLECULE: LIM/HOMEBOX PROTEIN LHX4,INSULIN GENE ENHANCER P
32: 2dar-A 6.3 2.2 62 90 26 MOLECULE: PDZ AND LIM DOMAIN PROTEIN 5;
33: 2dj7-A 6.3 7.9 72 80 28 MOLECULE: ACTIN-BINDING LIM PROTEIN 3;

```

**Supplementary Figure 5.** Structural alignment analysis of the Zyxin Lim domain by DALI server, indicates the similarity with transcription regulators.

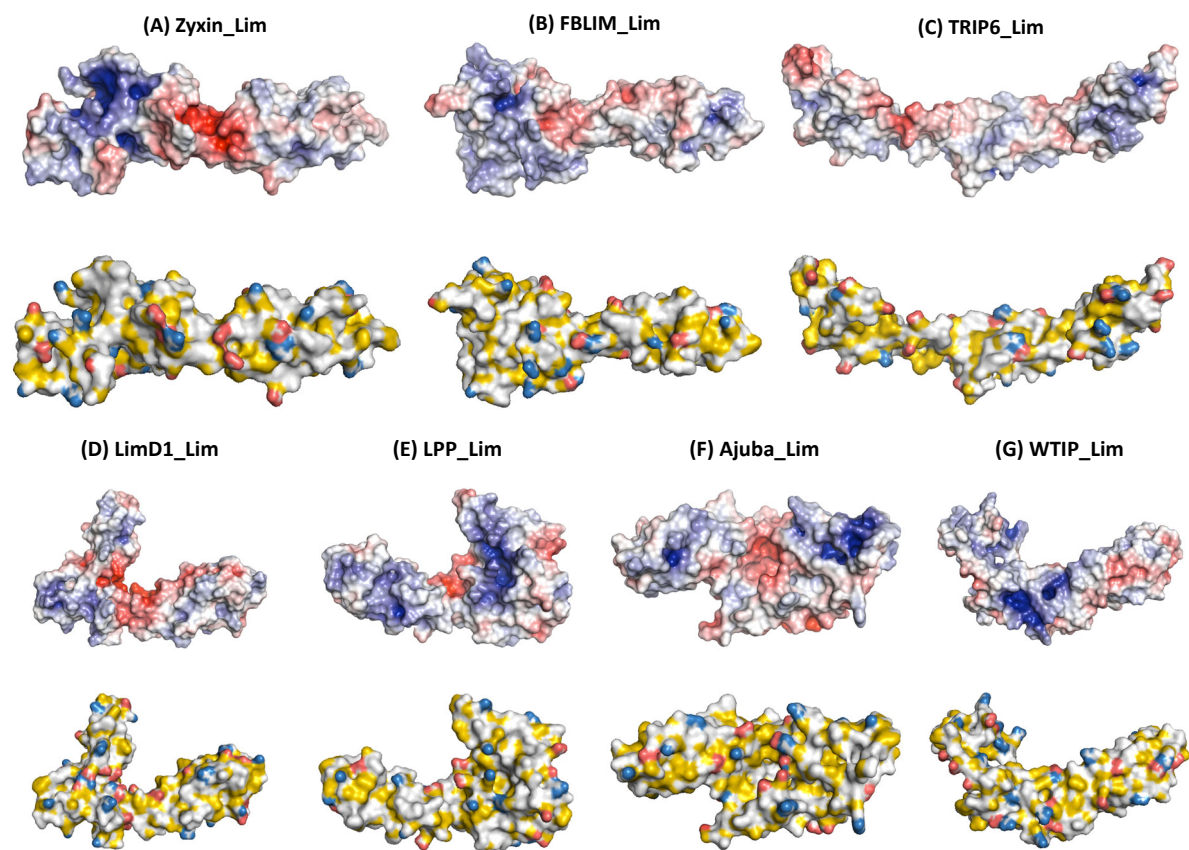

**Supplementary Figure 6.** (A) Adaptive Poisson-Boltzmann Solver (APBS) electrostatics and Yellow-Red-Blue (YRB) showing surface potential and hydrophobicity calculations, respectively; of Zyxin family Lim domains.

(A)

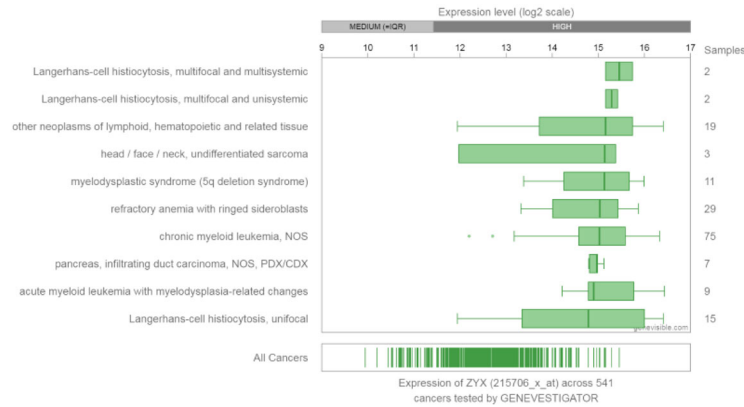

(B)

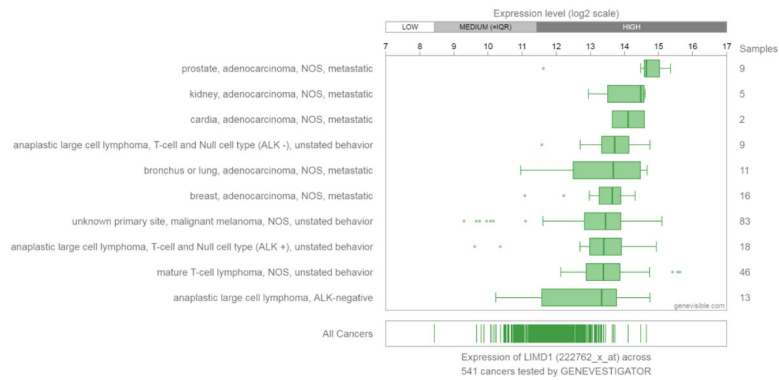

(C)

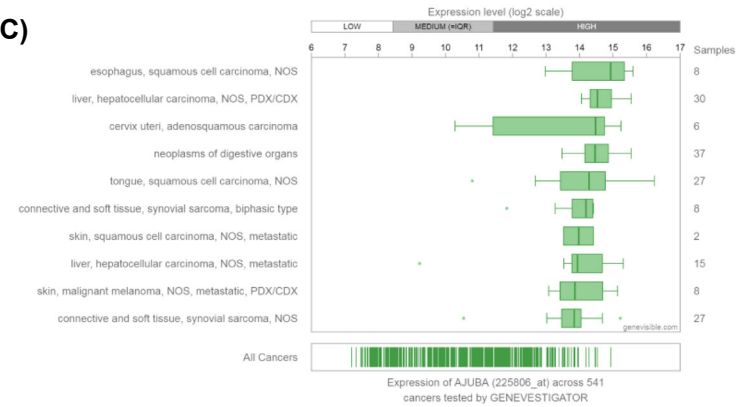

(D)

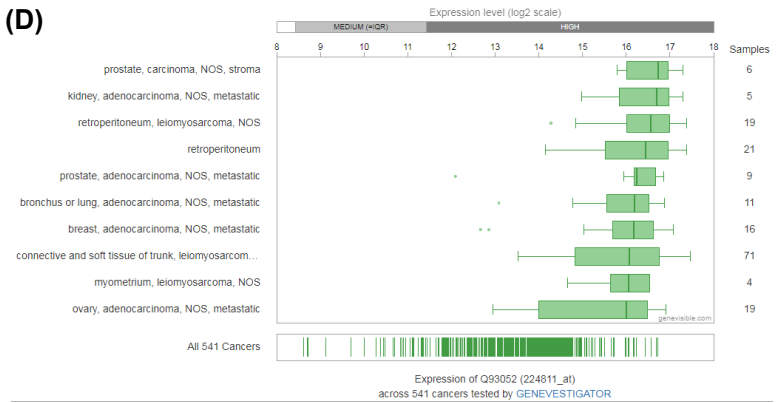

**Supplementary Figure 7.** The protein expression profiles of the Zyxin family proteins in different cancers (retrieved from Genevestigator) are presented as bar graphs. (A) Zyxin; (B) LIMD1; (C) Ajuba and (D) LPP. Evidently, the expression of Zyxin family proteins was high in almost all types of cancers.

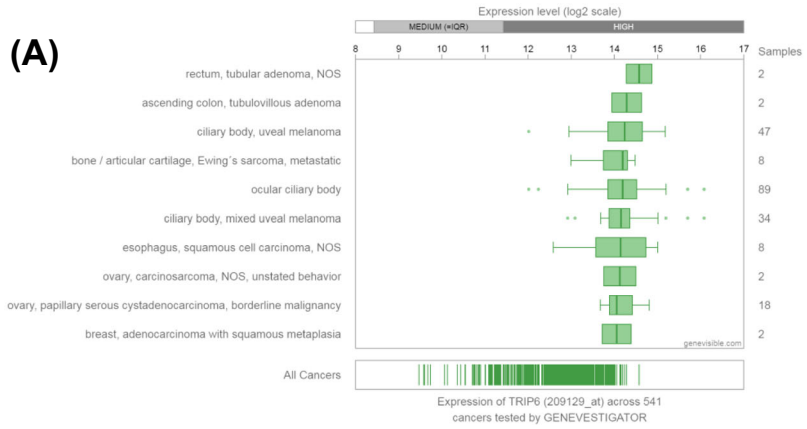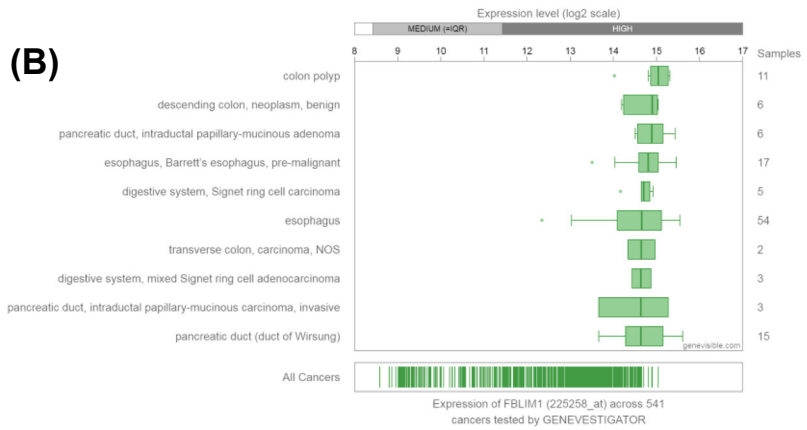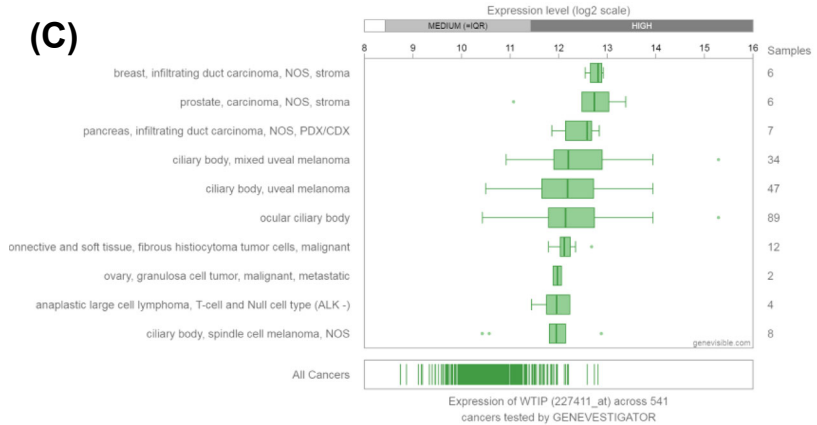

**Supplementary Figure 8.** The protein expression profiles of the Zyxin family proteins in different cancers (retrieved from Genevestigator) are presented as bar graphs. (A) TRIP6; (B) FBLIM; (C) WTIP. Evidently, the expression of Zyxin family proteins was high in almost all types of cancers.



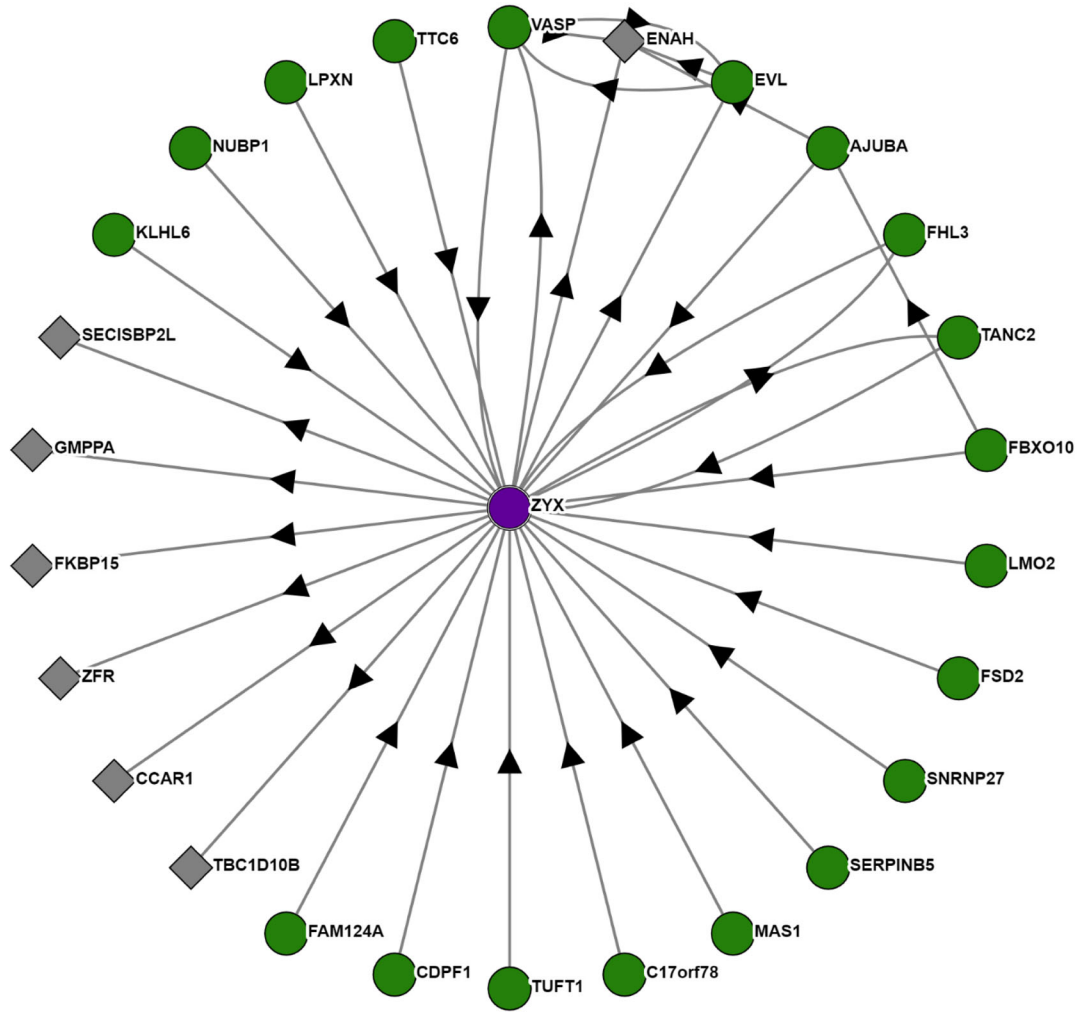

**Supplementary Figure 9.** Protein-protein interaction (PPI) analysis of Zyxin. The arrow indicates the bait and prey relationship of each protein. The bait protein is shown as a green circle whereas the prey protein is shown as grey squares.

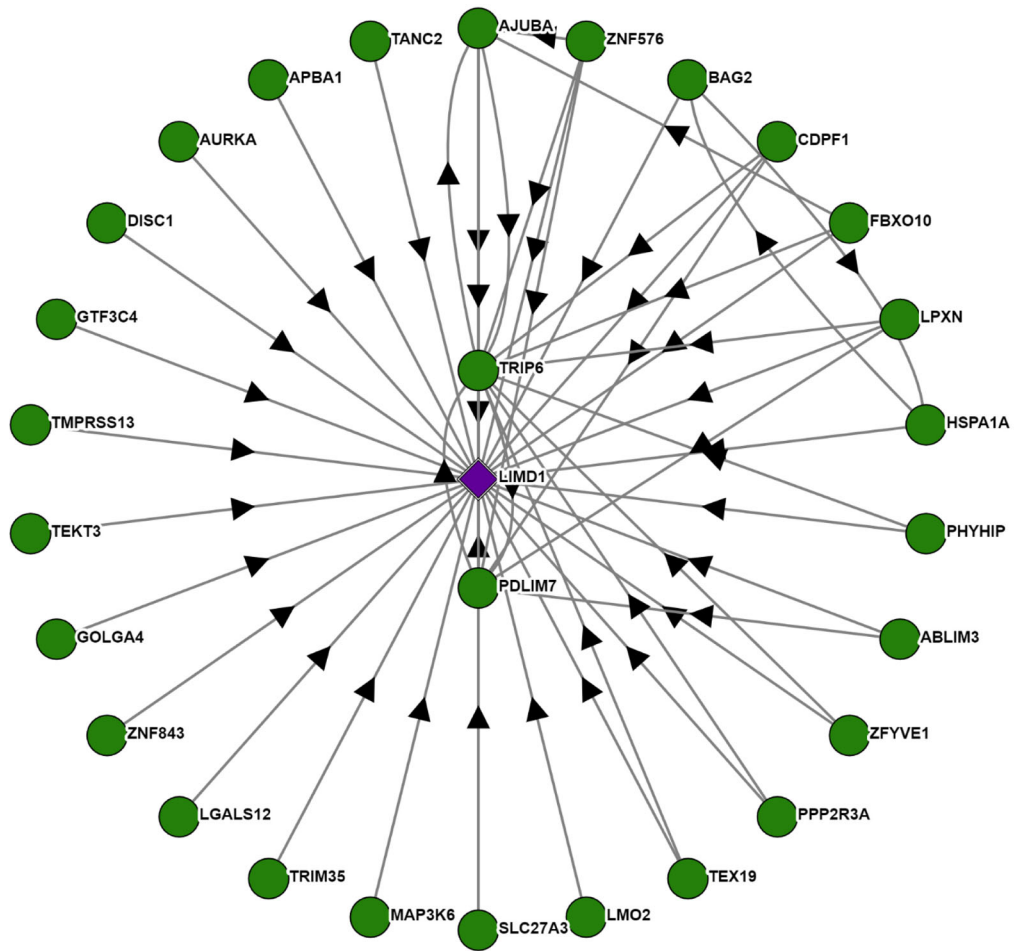

**Supplementary Figure 10.** Protein-protein interaction (PPI) analysis of LimD1. The arrow indicates the bait and prey relationship of each protein. The bait protein is shown as a green circle whereas the prey protein is shown as grey squares.

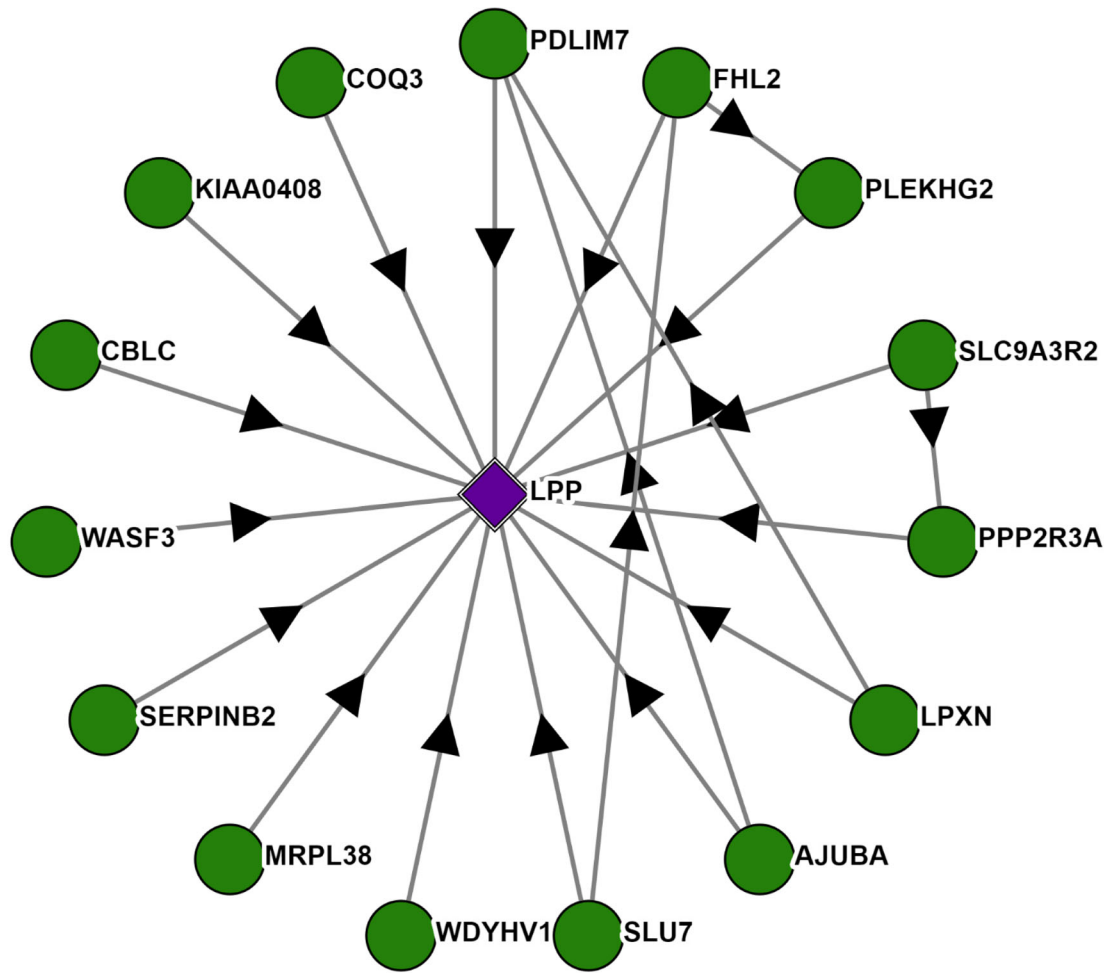

**Supplementary Figure 11.** Protein-protein interaction (PPI) analysis of LPP. The arrow indicates the bait and prey relationship of each protein. The bait protein is shown as a green circle whereas the prey protein is shown as grey squares.

**(A) FBLIM**

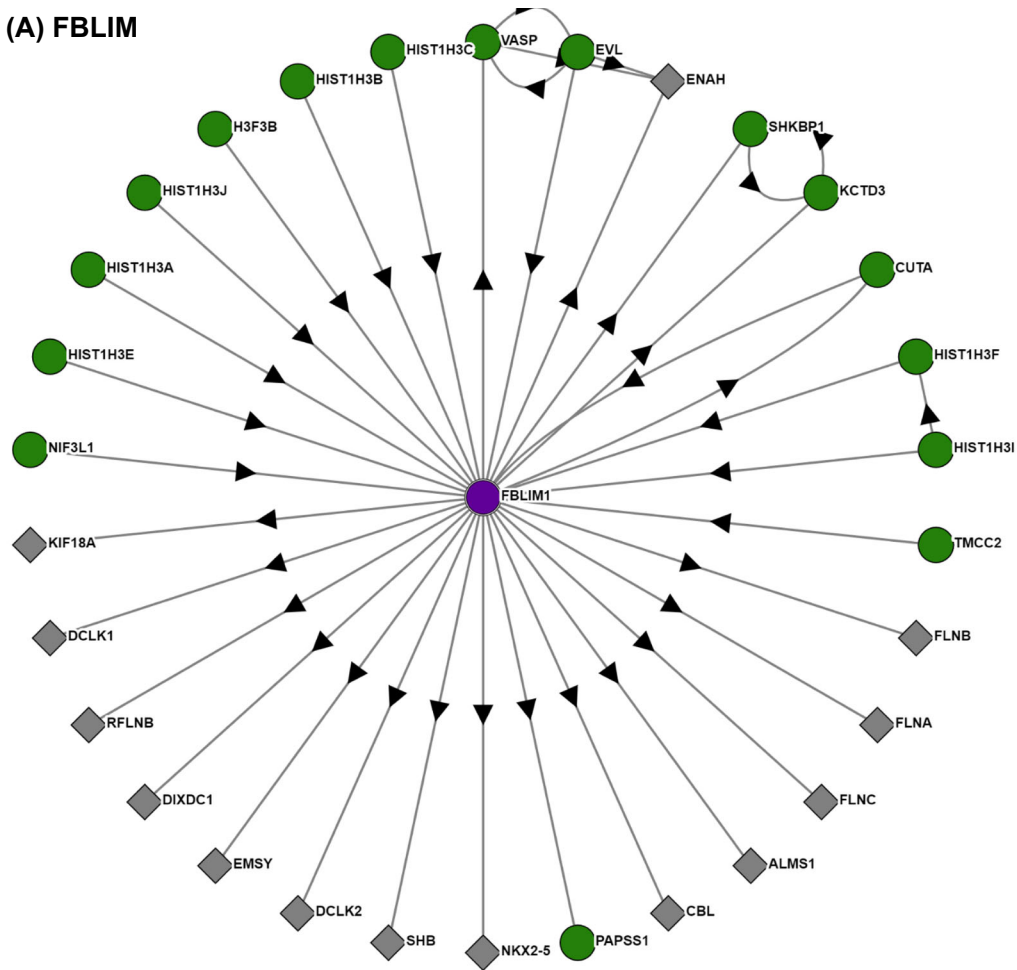

**(B) WTIP**

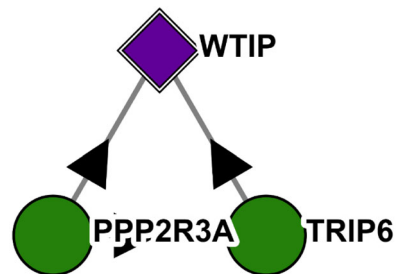

**Supplementary Figure 12.** Protein-protein interaction (PPI) analysis of (A) FBLIM and (B) WTIP. The arrow indicates the bait and prey relationship of each protein. The bait protein is shown as a green circle whereas the prey protein is shown as grey squares. The PPI analysis suggests WTIP has the least interacting partners.

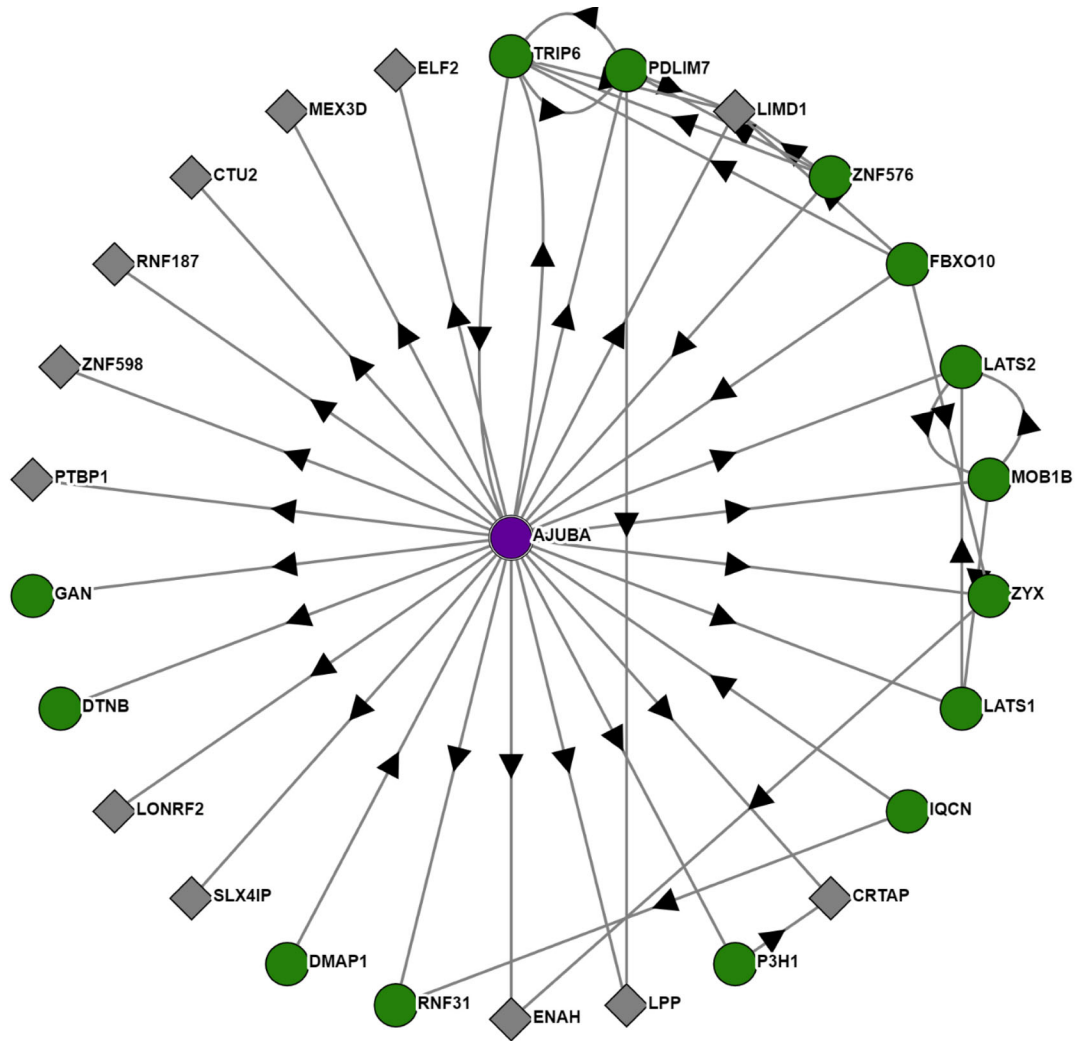

**Supplementary Figure 13.** Protein-protein interaction (PPI) analysis of Ajuba. The arrow indicates the bait and prey relationship of each protein. The bait protein is shown as a green circle whereas the prey protein is shown as grey squares.

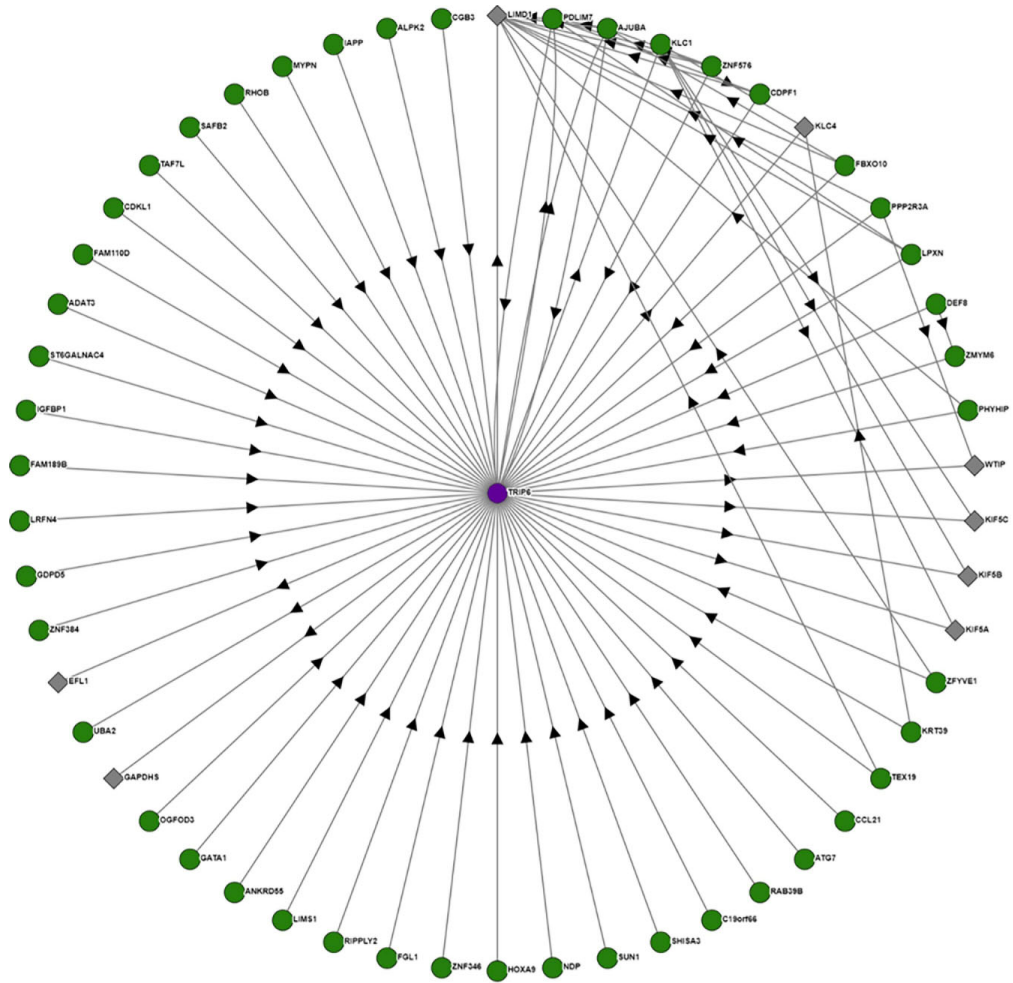

**Supplementary Figure 14.** Protein-protein interaction (PPI) analysis of TRIP6. The arrow indicates the bait and prey relationship of each protein. The bait protein is shown as a green circle whereas the prey protein is shown as grey squares. The PPI analysis suggests that TRIP6 has the maximum number of interacting partners.

**(A) OmniPath Analysis**

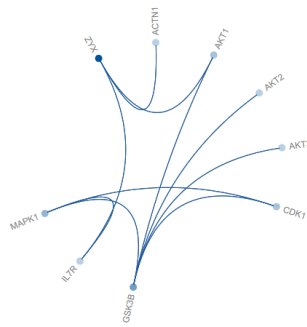

**(B) STITCH Analysis**

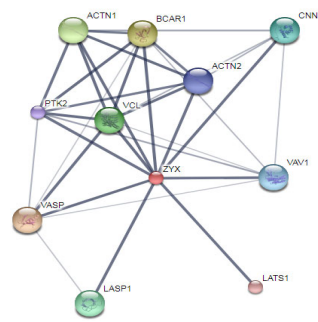

**(C) STRING Analysis**

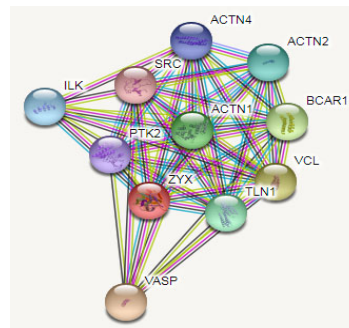

**Supplementary Figure 15.** Protein-protein interactions and pathway analysis, (A) Omnipath showing the zyxin involvement in Akt/IL7R pathway; (B) STITCH analysis; (C) STRING analysis.

**Supplementary Table 1.** Distribution of hydrophobic amino acids in each LIM domain of human Zyxin family proteins. The column for each LIM domain shows number of hydrophobic amino acids and the total hydrophobicity. These values were determined using ExPASy ProtParam, the hydrophobicity of each domain varies from ~36 to 47 %. The number of hydrophobic amino acid varied in each domain but tryptophan was absent amongst all LIMs except LIM3 of TRIP6.

| Human Family | Zyxin | Lim1  |       |       | Lim2  |       |       | Lim3  |       |  |
|--------------|-------|-------|-------|-------|-------|-------|-------|-------|-------|--|
| <b>Zyxin</b> | Ile=1 | Phe=3 | 41.8% | Ile=2 | Phe=2 | 36.6% | Ile=2 | Phe=2 | 39.1% |  |
|              | Val=1 | Trp=0 |       | Val=4 | Trp=0 |       | Val=5 | Trp=0 |       |  |
|              | Leu=6 |       |       | Leu=2 |       |       | Leu=4 |       |       |  |
|              | Cys=7 |       |       | Cys=6 |       |       | Cys=8 |       |       |  |
|              | Met=0 |       |       | Met=1 |       |       | Met=2 |       |       |  |
|              | Ala=7 |       |       | Ala=5 |       |       | Ala=4 |       |       |  |
| <b>LIMD1</b> | Ile=0 | Phe=7 | 46.8% | Ile=4 | Phe=3 | 47.6% | Ile=2 | Phe=1 | 36.1% |  |
|              | Val=4 | Trp=0 |       | Val=5 | Trp=0 |       | Val=4 | Trp=0 |       |  |
|              | Leu=3 |       |       | Leu=6 |       |       | Leu=7 |       |       |  |
|              | Cys=7 |       |       | Cys=7 |       |       | Cys=8 |       |       |  |
|              | Met=1 |       |       | Met=2 |       |       | Met=1 |       |       |  |
|              | Ala=7 |       |       | Ala=2 |       |       | Ala=2 |       |       |  |
| <b>Ajuba</b> | Ile=2 | Phe=4 | 40.3% | Ile=4 | Phe=3 | 44.3% | Ile=3 | Phe=2 | 43.3% |  |
|              | Val=3 | Trp=0 |       | Val=5 | Trp=0 |       | Val=2 | Trp=0 |       |  |
|              | Leu=4 |       |       | Leu=4 |       |       | Leu=6 |       |       |  |
|              | Cys=9 |       |       | Cys=8 |       |       | Cys=1 |       |       |  |
|              | Met=0 |       |       | Met=1 |       |       | 1     |       |       |  |
|              | Ala=3 |       |       | Ala=2 |       |       | Met=3 |       |       |  |
|              |       |       |       |       |       | Ala=3 |       |       |       |  |
| <b>LPP</b>   | Ile=3 | Phe=3 | 43.3% | Ile=5 | Phe=4 | 44.3% | Ile=4 | Phe=1 | 38.9% |  |
|              | Val=5 | Trp=0 |       | Val=3 | Trp=0 |       | Val=5 | Trp=0 |       |  |
|              | Leu=2 |       |       | Leu=3 |       |       | Leu=5 |       |       |  |
|              | Cys=8 |       |       | Cys=6 |       |       | Cys=8 |       |       |  |
|              | Met=1 |       |       | Met=2 |       |       | Met=1 |       |       |  |
|              | Ala=4 |       |       | Ala=4 |       |       | Ala=3 |       |       |  |
| <b>WTIP</b>  | Ile=3 | Phe=4 | 40.4% | Ile=3 | Phe=3 | 46%   | Ile=2 | Phe=0 | 40.4% |  |
|              | Val=2 | Trp=0 |       | Val=7 | Trp=0 |       | Val=3 | Trp=0 |       |  |
|              | Leu=4 |       |       | Leu=4 |       |       | Leu=8 |       |       |  |
|              | Cys=7 |       |       | Cys=7 |       |       | Cys=9 |       |       |  |
|              | Met=1 |       |       | Met=2 |       |       | Met=1 |       |       |  |
|              | Ala=4 |       |       | Ala=2 |       |       | Ala=5 |       |       |  |
| <b>FBLIM</b> | Ile=1 | Phe=3 | 37.1% | Ile=3 | Phe=5 | 46.6% | Ile=5 | Phe=3 | 40%   |  |
|              | Val=2 | Trp=0 |       | Val=4 | Trp=0 |       | Val=3 | Trp=0 |       |  |
|              | Leu=4 |       |       | Leu=3 |       |       | Leu=4 |       |       |  |
|              | Cys=7 |       |       | Cys=7 |       |       | Cys=9 |       |       |  |



|              |        |       |       |       |       |       |       |       |       |
|--------------|--------|-------|-------|-------|-------|-------|-------|-------|-------|
|              | Met=1  |       |       | Met=0 |       |       | Met=1 |       |       |
|              | Ala=5  |       |       | Ala=5 |       |       | Ala=3 |       |       |
| <b>TRIP6</b> | Ile=0  | Phe=3 | 47.4% | Ile=5 | Phe=4 | 45.3% | Ile=5 | Phe=1 | 43.2% |
|              | Val=9  | Trp=0 |       | Val=3 | Trp=0 |       | Val=3 | Trp=1 |       |
|              | Leu=2  |       |       | Leu=3 |       |       | Leu=6 |       |       |
|              | Cys=7  |       |       | Cys=6 |       |       | Cys=9 |       |       |
|              | Met=0  |       |       | Met=1 |       |       | Met=1 |       |       |
|              | Ala=6, |       |       | Ala=5 |       |       | Ala=4 |       |       |

**Supplementary Table 2.** Ohnolog analysis of Zyxin family proteins.

| Family Size | Ohnolog Family       |
|-------------|----------------------|
| 3           | AJUBA, LIMD1, WTIP   |
| 4           | FBLIM1,LPP,TRIP6,ZYX |

**Supplementary Table 3.** List of all online servers/databases used in the study.

| Name of Softwares/Databases           | Information                                                                                                     |
|---------------------------------------|-----------------------------------------------------------------------------------------------------------------|
| Uniprot                               | <a href="https://www.uniprot.org/">https://www.uniprot.org/</a>                                                 |
| Muscle                                | <a href="https://www.ebi.ac.uk/Tools/msa/muscle/">https://www.ebi.ac.uk/Tools/msa/muscle/</a>                   |
| ProtParam                             | <a href="https://web.expasy.org/protparam/">https://web.expasy.org/protparam/</a>                               |
| ProtScale                             | <a href="https://web.expasy.org/protscale/">https://web.expasy.org/protscale/</a>                               |
| NetNES                                | <a href="http://www.cbs.dtu.dk/services/NetNES/">www.cbs.dtu.dk/services/NetNES/</a>                            |
| NLStradamus                           | <a href="http://www.moseslab.csb.utoronto.ca/NLStradamus/">http://www.moseslab.csb.utoronto.ca/NLStradamus/</a> |
| MultAlin                              | <a href="http://www.sacs.ucsf.edu/cgi-bin/multalin.py">http://www.sacs.ucsf.edu/cgi-bin/multalin.py</a>         |
| PhosphoSitePlus v6.5.9.1              | <a href="https://www.phosphosite.org/homeAction">https://www.phosphosite.org/homeAction</a>                     |
| Swiss model workspace                 | <a href="http://swissmodel.expasy.org/workspace/">http://swissmodel.expasy.org/workspace/</a>                   |
| Procheck analysis                     | <a href="https://servicesn.mbi.ucla.edu/PROCHECK/">https://servicesn.mbi.ucla.edu/PROCHECK/</a>                 |
| Dali server                           | <a href="http://ekhidna2.biocenter.helsinki.fi/dali/">http://ekhidna2.biocenter.helsinki.fi/dali/</a>           |
| Bioplex explorer                      | <a href="https://bioplex.hms.harvard.edu/explorer/home">https://bioplex.hms.harvard.edu/explorer/home</a>       |
| Pharos interface                      | <a href="https://pharos.nih.gov/">https://pharos.nih.gov/</a>                                                   |
| OmniPath                              | <a href="http://omnipathdb.org/">http://omnipathdb.org/</a>                                                     |
| Signor 2.0                            | <a href="https://signor.uniroma2.it/">https://signor.uniroma2.it/</a>                                           |
| Genemania                             | <a href="https://genemania.org/">https://genemania.org/</a>                                                     |
| STRING analysis                       | <a href="https://string-db.org">https://string-db.org</a>                                                       |
| STITCH analysis                       | <a href="http://stitch.embl.de/cgi/">http://stitch.embl.de/cgi/</a>                                             |
| Molecular INteraction database (MINT) | <a href="https://mint.bio.uniroma2.it/">https://mint.bio.uniroma2.it/</a>                                       |
| GENEVESTIGATOR                        | <a href="https://genevestigator.com/">https://genevestigator.com/</a>                                           |
| iMODS server                          | <a href="http://imods.chaconlab.org/">http://imods.chaconlab.org/</a>                                           |
| WEBLOGO                               | <a href="https://weblogo.berkeley.edu/logo.cgi">https://weblogo.berkeley.edu/logo.cgi</a>                       |
| OHNOLOGS v2                           | <a href="http://ohnologs.curie.fr">http://ohnologs.curie.fr</a>                                                 |
| PhyML 3.0                             | <a href="http://www.atgc-montpellier.fr/phyml/">http://www.atgc-montpellier.fr/phyml/</a>                       |
